# Supplementary material for: Efficacy and safety of belimumab in paediatric and adult patients with systemic lupus erythematosus: an across-study comparison
Source: HighWire-hosted journal article supplement (doi:10.1136/rmdopen-2021-001747), 2021-09-01
Supplement: rmdopen-2021-001747supp001_data_supplement.pdf [file rmdopen-2021-001747supp001_data_supplement.pdf]

**The efficacy and safety of belimumab in paediatric and adult patients with systemic lupus erythematosus: an across-study comparison**

Hermine I Brunner<sup>1</sup>, Carlos Abud-Mendoza<sup>2</sup>, Masaaki Mori<sup>3</sup>, Clarissa Pilkington<sup>4</sup>, Reema Syed<sup>5</sup>, Syuji Takei<sup>6</sup>, Diego O Viola<sup>7</sup>, Richard Furie<sup>8</sup>, Sandra Navarra<sup>9</sup>, Fengchun Zhang<sup>10</sup>, Damon L Bass<sup>11</sup>, Gina Eriksson<sup>11</sup>, Anne E Hammer<sup>11</sup>, Beulah Ji<sup>12</sup>, Mohamed Okily<sup>12</sup>, David A Roth<sup>11</sup>, Holly Quasny<sup>13</sup>, Nicolino Ruperto<sup>14</sup><sub>1</sub>Clinical Pharmacology Modeling and Simulation, GSK, Shanghai, China; <sub>2</sub>Department of Pharmacy, Shanghai Chest Hospital, Shanghai Jiao Tong University, Shanghai, China

<sup>1</sup>Cincinnati Children's Hospital Medical Center, Division of Rheumatology, University of Cincinnati, Cincinnati, OH, USA; <sup>2</sup>Hospital Central "Dr Ignacio Morones Prieto", Unidad Regional de Reumatología y Osteoporosis, Hospital Central and Facultad de Medicina de la Universidad Autónoma de San Luis Potosí, San Luis Potosí, Mexico; <sup>3</sup>Department of Lifetime Clinical Immunology, Tokyo Medical and Dental University, Bunkyo-ku, Tokyo, Japan; <sup>4</sup>Great Ormond Street Hospital, London, UK; <sup>5</sup>Washington University School of Medicine in St Louis, St Louis Children's Hospital, St Louis, MO, USA; <sup>6</sup>Pediatrics and Developmental Medicine, Graduate School of Medical and Dental Sciences, Kagoshima University, Kagoshima, Japan; <sup>7</sup>Instituto CAICI, Reumatología, Rosario, Santa Fe, Argentina; <sup>8</sup>Division of Rheumatology, Northwell Health, Great Neck, NY, USA; <sup>9</sup>University of Santo Tomas, Manila, Philippines; <sup>10</sup>Peking Union Medical College Hospital, Chinese Academy of Medical Sciences and Peking Union Medical College, Beijing, China; <sup>11</sup>GlaxoSmithKline, Collegeville, PA, USA; <sup>12</sup>GlaxoSmithKline, Uxbridge, Middlesex, UK; <sup>13</sup>GlaxoSmithKline, Research Triangle Park, NC, USA; <sup>14</sup>IRCCS Istituto Giannina Gaslini, Clinica Pediatrica e Reumatologia, PRINTO, Genoa, Italy

**Corresponding author:** Hermine I Brunner

Cincinnati Children's Hospital Medical Center, Division of Rheumatology, University of Cincinnati, MLC 4010, 3333 Burnet Avenue, Cincinnati, OH, 45229, USA

Email: [Hermine.Brunner@cchmc.org](mailto:Hermine.Brunner@cchmc.org)

Tel (office): 513-636-7982

Tel (cell): 513-470-9334

**ORCID ID:** 0000-0001-9478-2987

## SUPPLEMENTARY MATERIALS

### Definition of a severe flare<sup>1</sup>

- A change in Safety of Estrogens in Lupus Erythematosus National Assessment-Systemic Lupus Erythematosus Disease Activity Index (SELENA-SLEDAI) >12, or
- new/worse central nervous system-systemic lupus erythematosus (SLE), vasculitis, nephritis, myositis, platelet <60,000 haemolytic anaemia with Hb <7 mg/dl, requiring doubling or >0.5 mg/kg/day prednisone, or
- hospitalisation for SLE, or
- prednisone >0.5 mg/kg/day, or
- new immunosuppressive, or
- increased physician's global assessment to >2.5

Note that the severe flare endpoint (modified SELENA-SLEDAI Flare Index [SFI]) used in these studies excludes severe flares that were triggered only by an increase in SELENA-SLEDAI score to >12.

### Covariates

Covariates used in selected analyses were:

- **PLUTO:** treatment group, baseline age (5–11 vs 12–17 years), SELENA-SLEDAI score ( $\leq 12$  vs  $\geq 13$ ).
- **BLISS-52 and BLISS-76:** treatment groups, SELENA-SLEDAI score ( $\leq 9$  vs  $\geq 10$ ), proteinuria (<2 g/24 hours vs  $\geq 2$  g/24 hours equivalent), race/ethnicity (Black African or indigenous American Ancestry vs other).
- **BLISS-NEA:** treatment group, country, SELENA-SLEDAI score, complement levels.
- **EMBRACE:** treatment group, SELENA-SLEDAI with modified SLE Disease Activity Index scoring for proteinuria (incorporates the SLEDAI-2000 [SS-S2K]) score ( $\leq 9$  vs  $\geq 10$ ), complement levels ( $\geq 1$  C3/C4 low vs no C3/C4 low), region (USA/Canada vs Rest of World).

## Supplementary tables

**Supplementary Table 1.** Study design, key eligibility criteria, and primary endpoint in PLUTO, BLISS-52, BLISS-76, BLISS-NEA, EMBRACE studies included in the efficacy comparison

| PLUTO <sup>2</sup>                                                               | BLISS-52 <sup>3</sup>                                                            | BLISS-76 <sup>4</sup>                                                            | BLISS-NEA <sup>5</sup>                                                                                                                                          | EMBRACE <sup>6</sup>                                                                                                                                                  |
|----------------------------------------------------------------------------------|----------------------------------------------------------------------------------|----------------------------------------------------------------------------------|-----------------------------------------------------------------------------------------------------------------------------------------------------------------|-----------------------------------------------------------------------------------------------------------------------------------------------------------------------|
| <b>Study design</b>                                                              |                                                                                  |                                                                                  |                                                                                                                                                                 |                                                                                                                                                                       |
| Belimumab: 10 mg/kg IV                                                           | Belimumab: 1 and 10 mg/kg IV                                                     | Belimumab: 1 and 10 mg/kg IV                                                     | Belimumab: 10 mg/kg IV                                                                                                                                          | Belimumab: 10 mg/kg IV                                                                                                                                                |
| Double-blind study phase: 52 weeks                                               | Double-blind phase: 52 weeks                                                     | Double-blind phase: 76 weeks                                                     | Double-blind phase: 52 weeks                                                                                                                                    | Double-blind phase: 52 weeks                                                                                                                                          |
| Study locations: North America, Latin America, Japan, Europe                     | Study locations: Latin America, Asia-Pacific, Eastern Europe                     | Study locations: North America and Europe                                        | Study locations: China, Japan and South Korea                                                                                                                   | Study locations: Brazil, Colombia, France, South Africa, UK and USA                                                                                                   |
| <b>Eligibility criteria</b>                                                      |                                                                                  |                                                                                  |                                                                                                                                                                 |                                                                                                                                                                       |
| ≥5–17 years of age                                                               | ≥18 years of age                                                                 | ≥18 years of age                                                                 | ≥18 years of age                                                                                                                                                | ≥18 years of age                                                                                                                                                      |
| Diagnosis of SLE according to ACR criteria, with ≥4 of 11 criteria being present | Diagnosis of SLE according to ACR criteria, with ≥4 of 11 criteria being present | Diagnosis of SLE according to ACR criteria, with ≥4 of 11 criteria being present | Diagnosis of SLE according to ACR criteria, with ≥4 of 11 criteria being present                                                                                | Diagnosis of SLE according to ACR criteria, with ≥4 of 11 criteria being present                                                                                      |
| SELENA-SLEDAI ≥6 at screening                                                    | SELENA-SLEDAI ≥6 at screening                                                    | SELENA-SLEDAI ≥6                                                                 | SELENA-SLEDAI ≥8                                                                                                                                                | SELENA-SLEDAI ≥8                                                                                                                                                      |
| Seropositive for antinuclear antibodies and/or anti-dsDNA antibodies                                                                                            | Seropositive for antinuclear antibodies and/or anti-dsDNA antibodies                                                                                                  |
| No severe lupus kidney disease or active CNS lupus                               | No severe active LN or CNS manifestations                                        | No severe active LN or CNS manifestations or serious intercurrent illness        | No severe lupus kidney disease or active nephritis requiring therapy within 90 days of study start or CNS lupus requiring therapy within 60 days of study start | No severe lupus kidney disease or active nephritis requiring acute therapy within 90 days of study start or CNS lupus requiring therapy within 60 days of study start |

|                                                                                                                                  |                                                                                                                             |                                                                                                                             |                                                                                                                                  |                                                                                                                                           |
|----------------------------------------------------------------------------------------------------------------------------------|-----------------------------------------------------------------------------------------------------------------------------|-----------------------------------------------------------------------------------------------------------------------------|----------------------------------------------------------------------------------------------------------------------------------|-------------------------------------------------------------------------------------------------------------------------------------------|
|                                                                                                                                  |                                                                                                                             |                                                                                                                             | No requirement for new SLE medications other than glucocorticoids within 60 days of study start                                  | No history of a major organ transplant<br>No requirement for new SLE medications other than glucocorticoids within 60 days of study start |
| Stable treatment regimen with glucocorticoids, NSAIDs, antimalarials or immunosuppressives for $\geq 30$ days before study start | Stable treatment regimen with prednisone, NSAIDs, antimalarials or immunosuppressives for $\geq 30$ days before study start | Stable treatment regimen with prednisone, NSAIDs, antimalarials or immunosuppressives for $\geq 30$ days before study start | Stable treatment regimen with glucocorticoids, NSAIDs, antimalarials or immunosuppressives for $\geq 30$ days before study start | Stable treatment regimen with glucocorticoids, NSAIDs, antimalarials or immunosuppressives for $\geq 30$ days before study start          |
| SRI-4 response rate at Week 52                                                                                                   | SRI-4 response rate at Week 52                                                                                              | SRI-4 response rate at Week 52                                                                                              | SRI-4 response rate at Week 52                                                                                                   | SRI-2K response rate at Week 52                                                                                                           |

ACR, American College of Rheumatology; CNS, central nervous system; dsDNA, double-stranded deoxyribonucleic acid; IV, intravenous; LN, lupus nephritis;

NSAID, non-steroidal anti-inflammatory drug; SELENA-SLEDAI, Safety of Estrogens in Lupus Erythematosus National Assessment-SLE Disease Activity Index; SLE,

systemic lupus erythematosus; SRI, SLE Responder Index.

**Supplementary Table 2.** SRI-4 response at Week 52 by subgroups for PLUTO, pooled BLISS-52 and BLISS-76 and BLISS-NEA studies and SRI-S2K response at Week 52 by subgroups for EMBRACE study (mITT population)

|                                                               | PLUTO             |                                    | BLISS-52 and BLISS-76 |                                     | BLISS-NEA          |                                     | EMBRACE            |                                     |
|---------------------------------------------------------------|-------------------|------------------------------------|-----------------------|-------------------------------------|--------------------|-------------------------------------|--------------------|-------------------------------------|
|                                                               | Placebo<br>(n=40) | Belimumab<br>10 mg/kg IV<br>(n=53) | Placebo<br>(n=562)    | Belimumab<br>10 mg/kg IV<br>(n=563) | Placebo<br>(n=226) | Belimumab<br>10 mg/kg IV<br>(n=451) | Placebo<br>(n=149) | Belimumab<br>10 mg/kg IV<br>(n=299) |
| <b>mITT population</b>                                        |                   |                                    |                       |                                     |                    |                                     |                    |                                     |
| N                                                             | 39                | 53                                 | 562                   | 563                                 | 217                | 446                                 | 149                | 298                                 |
| Response, n (%)                                               | 17 (43.6)         | 28 (52.8)                          | 218 (38.8)            | 285 (50.6)                          | 87 (40.1)          | 240 (53.8)                          | 71 (47.7)          | 157 (52.7)                          |
| Treatment difference<br>vs placebo, %                         | -                 | 9.24                               | -                     | 11.83                               | -                  | 13.72                               | -                  | 5.03                                |
| OR (95% CI)                                                   | -                 | 1.49 (0.64, 3.46)                  | -                     | 1.68 (1.32, 2.15)                   | -                  | 1.99 (1.40, 2.82)                   | -                  | 1.28 (0.85, 1.92)                   |
| <b>Baseline SELENA-SLEDAI score ≥10</b>                       |                   |                                    |                       |                                     |                    |                                     |                    |                                     |
| N                                                             | 25                | 31                                 | 299                   | 296                                 | 123                | 233                                 | 90                 | 153                                 |
| Response, n (%)                                               | 12 (48.0)         | 18 (58.1)                          | 132 (44.1)            | 187 (63.2)                          | 58 (47.2)          | 164 (70.4)                          | 36 (40.0)          | 81 (52.9)                           |
| Treatment difference<br>vs placebo, %                         | -                 | 10.06                              | -                     | 19.03                               | -                  | 23.23                               | -                  | 12.94                               |
| OR (95% CI)                                                   | -                 | 1.50 (0.52, 4.33)                  | -                     | 2.22 (1.59, 3.10)                   | -                  | 2.66 (1.69, 4.19)                   | -                  | 1.90 (1.10, 3.29)                   |
| <b>Baseline SELENA-SLEDAI score ≤9</b>                        |                   |                                    |                       |                                     |                    |                                     |                    |                                     |
| N                                                             | 14                | 22                                 | 263                   | 267                                 | 94                 | 213                                 | 59                 | 145                                 |
| Response, n (%)                                               | 5 (35.7)          | 10 (45.5)                          | 86 (32.7)             | 98 (36.7)                           | 29 (30.9)          | 76 (35.7)                           | 26 (44.1)          | 65 (44.8)                           |
| Treatment difference<br>vs placebo, %                         | -                 | 9.74                               | -                     | 4.00                                | -                  | 4.83                                | -                  | 0.76                                |
| OR (95% CI)                                                   | -                 | 1.50 (0.38, 5.95)                  | -                     | 1.16 (0.81, 1.67)                   | -                  | 1.24 (0.74, 2.09)                   | -                  | 0.92 (0.48, 1.73)                   |
| <b>Baseline low C3/C4* and anti-dsDNA ≥30 IU/ml</b>           |                   |                                    |                       |                                     |                    |                                     |                    |                                     |
| N                                                             | 16                | 22                                 | 287                   | 305                                 | 135                | 291                                 | 50                 | 91                                  |
| Response, n (%)                                               | 6 (37.5)          | 8 (36.4)                           | 91 (31.7)             | 157 (51.5)                          | 46 (34.1)          | 156 (53.6)                          | 12 (24.0)          | 41 (45.1)                           |
| Treatment difference<br>vs placebo, %                         | -                 | -1.14                              | -                     | 19.77                               | -                  | 19.53                               | -                  | 21.05                               |
| OR (95% CI)                                                   | -                 | 0.95 (0.25, 3.61)                  | -                     | 2.73 (1.91, 3.89)                   | -                  | 2.24 (1.46, 3.42)                   | -                  | 3.00 (1.35, 6.68)                   |
| <b>Baseline normal/high C3/C4 and anti-dsDNA &lt;30 IU/ml</b> |                   |                                    |                       |                                     |                    |                                     |                    |                                     |
| N                                                             | 23                | 31                                 | 275                   | 258                                 | 82                 | 155                                 | 99                 | 207                                 |
| Response, n (%)                                               | 11 (47.8)         | 20 (64.5)                          | 127 (46.2)            | 128 (49.6)                          | 41 (50.0)          | 84 (54.2)                           | 50 (50.5)          | 104 (50.2)                          |
| Treatment difference<br>vs placebo, %                         | -                 | 16.69                              | -                     | 3.43                                | -                  | 4.19                                | -                  | -0.26                               |

|             | PLUTO             |                                    | BLISS-52 and BLISS-76 |                                     | BLISS-NEA          |                                     | EMBRACE            |                                     |
|-------------|-------------------|------------------------------------|-----------------------|-------------------------------------|--------------------|-------------------------------------|--------------------|-------------------------------------|
|             | Placebo<br>(n=40) | Belimumab<br>10 mg/kg IV<br>(n=53) | Placebo<br>(n=562)    | Belimumab<br>10 mg/kg IV<br>(n=563) | Placebo<br>(n=226) | Belimumab<br>10 mg/kg IV<br>(n=451) | Placebo<br>(n=149) | Belimumab<br>10 mg/kg IV<br>(n=299) |
| OR (95% CI) | -                 | 1.98 (0.66, 5.96)                  | -                     | 1.12 (0.78, 1.59)                   | -                  | 1.18 (0.69, 2.02)                   | -                  | 1.01 (0.62, 1.66)                   |

\*Low C3 defined as <90 mg/dl and low C4 defined as <10 mg/dl.

C, complement; CI, confidence interval; dsDNA, double-stranded DNA; mITT, modified intention-to-treat; OR, odds ratio; SELENA-SLEDAI, Safety of Estrogens in Lupus Erythematosus National Assessment-SLE Disease Activity Index.

**Supplementary references**

1. Petri M, Buyon J, Kim M. Classification and definition of major flares in SLE clinical trials. *Lupus* 1999;8:685-691.
2. Brunner HI, Abud-Mendoza C, Viola DO, *et al.* Safety and efficacy of intravenous belimumab in children with systemic lupus erythematosus: results from a randomised, placebo-controlled trial. *Ann Rheum Dis* 2020;79:1340-1348.
3. Navarra SV, Guzman RM, Gallacher AE, *et al.* Efficacy and safety of belimumab in patients with active systemic lupus erythematosus: a randomised, placebo-controlled, phase 3 trial. *Lancet (London, England)* 2011;377:721-731.
4. Furie R, Petri M, Zamani O, *et al.* A phase III, randomized, placebo-controlled study of belimumab, a monoclonal antibody that inhibits B lymphocyte stimulator, in patients with systemic lupus erythematosus. *Arthritis Rheum* 2011;63:3918-3930.
5. Zhang F, Bae SC, Bass D, *et al.* A pivotal phase III, randomised, placebo-controlled study of belimumab in patients with systemic lupus erythematosus located in China, Japan and South Korea. *Ann Rheum Dis* 2018;77:355-363.
6. Ginzler E, Guedes Barbosa LS, D'Cruz D, *et al.* EMBRACE: Phase 3/4, Randomized, 52-Week Study of Belimumab Efficacy and Safety in Patients of Black African Ancestry With Systemic Lupus Erythematosus. *Arthritis Rheumatol* 2021 doi: 10.1002/art.41900
